# Supplementary material
Source: PubMed Central journal article supplement (PMC8595187)
Supplement: 11262_2021_1866_MOESM1_ESM.pdf [file 11262_2021_1866_MOESM1_ESM.pdf]

| GISAIID Acknowledgements                                      |                                                                                                                      |                         |                                                                                                                                                                                                                                                                                                                                        |
|---------------------------------------------------------------|----------------------------------------------------------------------------------------------------------------------|-------------------------|----------------------------------------------------------------------------------------------------------------------------------------------------------------------------------------------------------------------------------------------------------------------------------------------------------------------------------------|
| Originating lab                                               | Submitting lab                                                                                                       | Authors                 | Samples                                                                                                                                                                                                                                                                                                                                |
| St Vincent's Pathology (SydPath)                              | NSW Health Pathology - Institute of Clinical Pathology and Medical Research; Westmead Hospital; University of Sydney | CIDM-PH et al. et al    | Australia/NSW1328/2020 (EPI_ISL_767894)                                                                                                                                                                                                                                                                                                |
| unknown                                                       | Public Health Virology Laboratory, Forensic and Scientific Services (PHV-FSS)                                        | Son Nguyen et al. et al | Australia/QLD1140/2020 (EPI_ISL_593641)                                                                                                                                                                                                                                                                                                |
| Department of Clinical Microbiology                           | GIGA Medical Genomics                                                                                                | Keith Durkin et al      | Belgium/ULG-10838/2020 (EPI_ISL_666873)                                                                                                                                                                                                                                                                                                |
| DB Diagnosticos do Brasil                                     | Laboratório de Parasitologia Médica - Instituto de Medicina Tropical - Universidade de São Paulo                     | Nuno Faria et al        | Brazil/AM-L70-CD1722/2020 (EPI_ISL_804823)                                                                                                                                                                                                                                                                                             |
| Laboratorio de Virologia Molecular / UFRJ                     | Bioinformatics Laboratory / LNCC                                                                                     | Carolina M Voloch et al | Brazil/RJ-00541/2020 (EPI_ISL_717925)                                                                                                                                                                                                                                                                                                  |
| Genetica Molecular and Subdepartamento de Virologia ISP Chile | Instituto de Salud Publica de Chile                                                                                  | Javier Tognarelli et al | Chile/MA-194116-B/2020 (EPI_ISL_746529)                                                                                                                                                                                                                                                                                                |
| The National Institute of Public Health                       | State Veterinary Institute Prague                                                                                    | Nagy et al              | CzechRepublic/NRL_10181/2020 (EPI_ISL_626625), CzechRepublic/NRL_10421/2020 (EPI_ISL_737012), CzechRepublic/NRL_10594/2020 (EPI_ISL_737032), CzechRepublic/NRL_11782-2/2020 (EPI_ISL_792704), CzechRepublic/NRL_8884/2020 (EPI_ISL_626577), CzechRepublic/NRL_9840/2020 (EPI_ISL_626609), CzechRepublic/NRL-9962/2020 (EPI_ISL_660554) |

| GISAID Acknowledgements                                                                                  |                                                                                    |                                         |                                                                                                                                                                                                                  |
|----------------------------------------------------------------------------------------------------------|------------------------------------------------------------------------------------|-----------------------------------------|------------------------------------------------------------------------------------------------------------------------------------------------------------------------------------------------------------------|
| Originating lab                                                                                          | Submitting lab                                                                     | Authors                                 | Samples                                                                                                                                                                                                          |
| Department of Virus and Microbiological Special Diagnostics, Statens Serum Institut, Copenhagen, Denmark | Albertsen Lab, Department of Chemistry and Bioscience, Aalborg University, Denmark | Danish Covid-19 Genome Consortium et al | Denmark/DCGC-12314/2020 (EPI_ISL_682495), Denmark/DCGC-19132/2020 (EPI_ISL_748268), Denmark/DCGC-23126/2020 (EPI_ISL_793371), Denmark/DCGC-24852/2020 (EPI_ISL_795339), Denmark/DCGC-27186/2020 (EPI_ISL_817500) |
| Department of Virus and Microbiological Special Diagnostics, Statens Serum Institut, Denmark             | Albertsen lab, Department of Chemistry and Bioscience, Aalborg University, Denmark | Danish Covid-19 Genome Consortia et al  | Denmark/DCGC-1278/2020 (EPI_ISL_618071), Denmark/DCGC-2203/2020 (EPI_ISL_617504), Denmark/DCGC-4406/2020 (EPI_ISL_621827)                                                                                        |
| Respiratory Virus Unit, Microbiology Services Colindale, Public Health England                           | Respiratory Virus Unit, Microbiology Services Colindale, Public Health England     | Monica Galiano et al                    | England/20130069504/2020 (EPI_ISL_423656)                                                                                                                                                                        |
| Respiratory Virus Unit, National Infection Service, Public Health England                                | COVID-19 Genomics UK (COG-UK) Consortium                                           | PHE Covid Sequencing Team et al         | England/205082085/2020 (EPI_ISL_733592)                                                                                                                                                                          |
| Lighthouse Lab in Alderley Park                                                                          | Wellcome Sanger Institute for the COVID-19 Genomics UK (COG-UK) consortium         | Jacquelyn Wynn et al                    | England/ALDP-A6F90A/2020 (EPI_ISL_607092)                                                                                                                                                                        |

| GISAID Acknowledgements                          |                                                                            |                                           |                                                                                                                                        |
|--------------------------------------------------|----------------------------------------------------------------------------|-------------------------------------------|----------------------------------------------------------------------------------------------------------------------------------------|
| Originating lab                                  | Submitting lab                                                             | Authors                                   | Samples                                                                                                                                |
| Lighthouse Lab in Alderley Park                  | Wellcome Sanger Institute for the COVID-19 Genomics UK (COG-UK) Consortium | Jacquelyn Wynn et al                      | England/ALDP-B24B28/2020 (EPI_ISL_647005),<br>England/ALDP-DC5EC4/2020 (EPI_ISL_822058),<br>England/ALDP-DCB295/2020 (EPI_ISL_822172)  |
| Lighthouse Lab in Cambridge                      | Wellcome Sanger Institute for the COVID-19 Genomics UK (COG-UK) Consortium | Rob Howes et al                           | England/CAMC-B1FC1E/2020 (EPI_ISL_647519)                                                                                              |
| Department of Pathology, University of Cambridge | COVID-19 Genomics UK (COG-UK) Consortium                                   | Aminu S. Jahun et al                      | England/CAMC-BBB92C/2020 (EPI_ISL_704384)                                                                                              |
| Lighthouse Lab in Milton Keynes                  | Wellcome Sanger Institute for the COVID-19 Genomics UK (COG-UK) consortium | The Lighthouse Lab in Milton Keynes et al | England/MILK-9AB3C9/2020 (EPI_ISL_551056),<br>England/MILK-A7DC1F/2020 (EPI_ISL_606346),<br>England/MILK-AB86B0/2020 (EPI_ISL_623362)  |
| Lighthouse Lab in Milton Keynes                  | Wellcome Sanger Institute for the COVID-19 Genomics UK (COG-UK) Consortium | The Lighthouse Lab in Milton Keynes et al | England/MILK-C2F60D/2020 (EPI_ISL_782957)                                                                                              |
| Quadram Institute Bioscience                     | COVID-19 Genomics UK (COG-UK) Consortium                                   | Dave J. Baker et al                       | England/NORW-F2CFE/2020 (EPI_ISL_650120)                                                                                               |
| Lighthouse Lab in Glasgow                        | Wellcome Sanger Institute for the COVID-19 Genomics UK (COG-UK) consortium | Harper VanSteenhouse et al                | England/QEUH-9611E3/2020 (EPI_ISL_531939),<br>England/QEUH-96F75C/2020 (EPI_ISL_540238),<br>Scotland/QEUH-9B85F0/2020 (EPI_ISL_568224) |

| GISAID Acknowledgements                                                                                                                                                          |                                                                                                                                |                             |                                                                                                    |
|----------------------------------------------------------------------------------------------------------------------------------------------------------------------------------|--------------------------------------------------------------------------------------------------------------------------------|-----------------------------|----------------------------------------------------------------------------------------------------|
| Originating lab                                                                                                                                                                  | Submitting lab                                                                                                                 | Authors                     | Samples                                                                                            |
| Virology Department, Sheffield Teaching Hospitals NHS Foundation Trust/Department of Infection, Immunity and Cardiovascular Disease, The Medical School, University of Sheffield | COVID-19 Genomics UK (COG-UK) Consortium                                                                                       | Thushan de Silva et al      | England/SHEF-CA66A/2020 (EPI_ISL_680168)                                                           |
| CNR Virus des Infections Respiratoires - France SUD                                                                                                                              | CNR Virus des Infections Respiratoires - France SUD                                                                            | Antonin Bal et al           | France/ARA-96089/2020 (EPI_ISL_732701)                                                             |
| CHU Purpan - Laboratoire de Virologie - Institut Fédératif de Biologie                                                                                                           | CHU Purpan - Laboratoire de Virologie - Institut Fédératif de Biologie                                                         | Latour J. et al             | France/OCC-189/2020 (EPI_ISL_804373)                                                               |
| University of Debrecen, Department of Medical Microbiology                                                                                                                       | National Laboratory of Virology, Szentágothai Research Centre                                                                  | Endre Gábor Tóth et al      | Hungary/UD-90512/2020 (EPI_ISL_671473)                                                             |
| The National University Hospital of Iceland                                                                                                                                      | deCODE genetics                                                                                                                | Daniel F Gudbjartsson et al | Iceland/352/2020 (EPI_ISL_424376)                                                                  |
| CSIR-Indian Institute of Chemical Biology, MEDICA Superpecialty Hospital Kolkata                                                                                                 | CSIR-Indian Institute of Chemical Biology, MEDICA Superpecialty Hospital Kolkata                                               | Sujay Krishna Maity et al   | India/WB-IICB-036/2020 (EPI_ISL_661309)                                                            |
| National Virus Reference Laboratory                                                                                                                                              | National Virus Reference Laboratory                                                                                            | Michael Carr et al          | Ireland/CO-NVRL-75IRL32904/2020 (EPI_ISL_671872), Ireland/KE-NVRL-73IRL40299/2020 (EPI_ISL_578300) |
| Pathogen Genomics Center, National Institute of Infectious Diseases                                                                                                              | Pathogen Genomics Center, National Institute of Infectious Diseases                                                            | Tsuyoshi Sekizuka et al     | Japan/IC-0489/2020 (EPI_ISL_768698)                                                                |
| Institute for Medical Research, Infectious Disease Research Centre, National Institutes of Health, Ministry of Health Malaysia                                                   | Institute for Medical Research, Infectious Disease Research Centre, National Institutes of Health, Ministry of Health Malaysia | Suppiah J et al             | Malaysia/IMR-WI194/2020 (EPI_ISL_718307)                                                           |
| Ministry of Health Hospitals                                                                                                                                                     | Institute of Health and Community Medicine                                                                                     | David Perera et al          | Malaysia/UNIMAS-M4061/2020 (EPI_ISL_718165)                                                        |

| GISAIID Acknowledgements                                                                                            |                                                                 |                               |                                                                                            |
|---------------------------------------------------------------------------------------------------------------------|-----------------------------------------------------------------|-------------------------------|--------------------------------------------------------------------------------------------|
| Originating lab                                                                                                     | Submitting lab                                                  | Authors                       | Samples                                                                                    |
| Dutch COVID-19 response team                                                                                        | National Institute for Public Health and the Environment (RIVM) | Adam Meijer et al             | Netherlands/GE-RIVM-20154/2020 (EPI_ISL_723167)                                            |
| LabPLUS                                                                                                             | Institute of Environmental Science and Research (ESR)           | Xiaoyun Ren et al             | NewZealand/20CV0692/2020 (EPI_ISL_755627)                                                  |
| Ostfold Hospital Trust - Kalnes, Centre for Laboratory Medicine, Section for gene technology and infection serology | Norwegian Institute of Public Health, Department of Virology    | Kathrine Stene-Johansen et al | Norway/3715/2020 (EPI_ISL_590987)                                                          |
| Haukeland University Hospital, Dept. of Microbiology                                                                | Norwegian Institute of Public Health, Department of Virology    | Kathrine Stene-Johansen et al | Norway/5852/2020 (EPI_ISL_775336)                                                          |
| Laboratory for Respiratory Viruses, Cantacuzino National Military-Medical Institute for Research and Development    | Cantacuzino Institute                                           | M.Lazar et al                 | Romania/284213/2020 (EPI_ISL_455468)                                                       |
| HELIX LLC                                                                                                           | WHO National Influenza Centre Russian Federation                | Andrey Komissarov et al       | Russia/MOS-RII-MH9270S/2020 (EPI_ISL_733427), Russia/PSK-RII-MH6191S/2020 (EPI_ISL_733361) |
| Institute of Virology, Biomedical Research Center of the Slovak Academy of Sciences, Bratislava                     | Faculty of Natural Sciences, Comenius University, Bratislava    | Viktória Hodorová et al       | Slovakia/UKBA-403/2020 (EPI_ISL_718251)                                                    |
| Institute of Virology, Biomedical Research Center of the Slovak Academy of Sciences, Bratislava                     | Faculty of Natural Sciences, Comenius University, Bratislava    | Kristína Boršová et al        | Slovakia/UKBA-404/2020 (EPI_ISL_718252), Slovakia/UKBA-604/2020 (EPI_ISL_788982)           |
| NHLS-IALCH                                                                                                          | KRISP, KZN Research Innovation and Sequencing Platform          | Giandhari J et al             | SouthAfrica/KRISP-DG01842216/2020 (EPI_ISL_736947)                                         |
| NHLS Universitas Academic                                                                                           | UFS Virology                                                    | PA Bester et al               | SouthAfrica/UFS-VIRO-NGS-35/2020 (EPI_ISL_682342)                                          |

| GISAID Acknowledgements                                                                                                                                               |                                                                                                                                                                                                                                                                                                                                                                           |                                  |                                                                                                    |
|-----------------------------------------------------------------------------------------------------------------------------------------------------------------------|---------------------------------------------------------------------------------------------------------------------------------------------------------------------------------------------------------------------------------------------------------------------------------------------------------------------------------------------------------------------------|----------------------------------|----------------------------------------------------------------------------------------------------|
| Originating lab                                                                                                                                                       | Submitting lab                                                                                                                                                                                                                                                                                                                                                            | Authors                          | Samples                                                                                            |
| Division of Emerging Infectious Diseases, Bureau of Infectious Diseases Diagnosis Control, Korea Disease Control and Prevention Agency                                | Division of Emerging Infectious Diseases, Bureau of Infectious Diseases Diagnosis Control, Korea Disease Control and Prevention Agency                                                                                                                                                                                                                                    | Ae Kyung Park et al              | SouthKorea/KDCA0108/2020 (EPI_ISL_747344)                                                          |
| Klinsisk mikrobiologi Linköping                                                                                                                                       | The Public Health Agency of Sweden                                                                                                                                                                                                                                                                                                                                        | Department of Microbiology et al | Sweden/20-53002/2020 (EPI_ISL_661285)                                                              |
| Viollier AG                                                                                                                                                           | Department of Biosystems Science and Engineering, ETH Zürich                                                                                                                                                                                                                                                                                                              | Christian Beisel et al           | Switzerland/BL-ETHZ-230022/2020 (EPI_ISL_516565), Switzerland/BL-ETHZ-270140/2020 (EPI_ISL_541451) |
| University Hospital Basel, Clinical Virology                                                                                                                          | University Hospital Basel, Clinical Bacteriology                                                                                                                                                                                                                                                                                                                          | Madlen Stange et al              | Switzerland/BS-42376604/2020 (EPI_ISL_581933)                                                      |
| Viollier AG                                                                                                                                                           | Department of Biosystems Science and Engineering, ETH Zürich                                                                                                                                                                                                                                                                                                              | Chaoran Chen et al               | Switzerland/SG-ETHZ-430703/2020 (EPI_ISL_796464), Switzerland/ZH-ETHZ-410010/2020 (EPI_ISL_737518) |
| 1-Laboratory of Microbiology, National Reference Lab, Charles Nicolle Hospital; 2-University of Tunis ElManar, Faculty of Medicine of Tunis, LR99ES09, Tunis, Tunisia | 1-Clinical and Experimental Pharmacology Lab, LR16SP02, National Center of Pharmacovigilance, University of Tunis El Manar, Tunis, Tunisia. 2- Neurodegenerative diseases and psychiatric troubles, LR18SP03, Razi Hospital, University of Tunis El Manar, Tunis, Tunisia. 3- Ministry of Health, National Observatory of New and Emerging Diseases, 1006, Tunis, Tunisia | Ilhem Boutiba-Ben Boubaker et al | Tunisia/3942/2020 (EPI_ISL_699657), Tunisia/61627/2020 (EPI_ISL_707698)                            |
| Uganda Central Public Health Lab and Uganda Virus Research Institute                                                                                                  | MRC/UVRI & LSHTM Uganda Research Unit                                                                                                                                                                                                                                                                                                                                     | Matthew Cotten et al             | Uganda/UG089/2020 (EPI_ISL_738000)                                                                 |

| GISAID Acknowledgements                                                                                                                 |                                                                                                                                         |                          |                                                  |
|-----------------------------------------------------------------------------------------------------------------------------------------|-----------------------------------------------------------------------------------------------------------------------------------------|--------------------------|--------------------------------------------------|
| Originating lab                                                                                                                         | Submitting lab                                                                                                                          | Authors                  | Samples                                          |
| Helix/Illumina                                                                                                                          | Genomics and Discovery, Respiratory Viruses Branch, Division of Viral Diseases, Centers for Disease Control and Prevention              | Peter W. Cook et al      | USA/AL-CDC-STM-034/2020 (EPI_ISL_802654)         |
| Massachusetts General Hospital                                                                                                          | Infectious Disease Program, Broad Institute of Harvard and MIT                                                                          | Lemieux et al            | USA/MA-MGH-03435/2020 (EPI_ISL_765837)           |
| Utah Public Health Laboratory                                                                                                           | Utah Public Health Laboratory                                                                                                           | Erin Young et al         | USA/NH-UPHL-2012558654/2020 (EPI_ISL_738357)     |
| Wadsworth Center, New York State Department of Health                                                                                   | Wadsworth Center, New York State Department of Health                                                                                   | Kirsten St. George et al | USA/NY-Wadsworth-222417-01/2020 (EPI_ISL_765509) |
| Houston Methodist Hospital                                                                                                              | Houston Methodist Hospital                                                                                                              | S. Wesley Long et al     | USA/TX-HMH-5181/2020 (EPI_ISL_544580)            |
| Wales Specialist Virology Centre Sequencing lab: Pathogen Genomics Unit                                                                 | COVID-19 Genomics UK (COG-UK) Consortium                                                                                                | Catherine Moore et al    | Wales/PHWC-16C03E/2020 (EPI_ISL_572878)          |
| National Institute for Communicable Disease Control and Prevention (ICDC) Chinese Center for Disease Control and Prevention (China CDC) | National Institute for Communicable Disease Control and Prevention (ICDC) Chinese Center for Disease Control and Prevention (China CDC) | Zhang et al              | Wuhan/Hu-1/2019 (EPI_ISL_402125)                 |
